# Supplementary material for: Low-temperature synthesis of SrTiO3nanoassemblies on DNA scaffolds and their applications in dye-sensitized solar cells and supercapacitors
Source: Royal Society of Chemistry journal article supplement (doi:10.1039/c7nj00204a), 2017-01-01
Supplement: c7nj00204a1.pdf [file c7nj00204a1.pdf]

## Online Supporting Information for

# Low-Temperature synthesis of SrTiO<sub>3</sub> nano-assemblies on DNA scaffold and their applications in Dye Sensitized Solar Cell and Supercapacitor

**K. Karthick<sup>‡†</sup>, Sivasankara Rao Ede<sup>‡†</sup>, U. Nithiyantham<sup>†#</sup> and Subrata Kundu<sup>†\$\*</sup>**

<sup>‡</sup>*Academy of Scientific and Innovative Research, CSIR-Central Electrochemical Research Institute- Campus, New Delhi, India*

<sup>†</sup>*Electrochemical Materials Science (ECMS) Division, CSIR-Central Electrochemical Research Institute (CECRI), Karaikudi-630006, Tamil Nadu, India*

<sup>#</sup>*CIC Energigune, Albert Einstein 48, Miñano, Alava 01510, Spain*

<sup>\$</sup>*Department of Materials Science and Mechanical Engineering, Texas A&M University, College Station, Texas, TX-77843, USA*

\* To whom correspondence should be addressed, *E-mail: [skundu@cecri.res.in](mailto:skundu@cecri.res.in) and [subrata\\_kundu2004@yahoo.co.in](mailto:subrata_kundu2004@yahoo.co.in), Fax: +91 4565-227651; Tel: +91 4565-241487.*

### **Instruments.**

The aggregated, SrTiO<sub>3</sub> nano-assemblies on DNA scaffold were characterized using several spectroscopic techniques. The transmission electron microscopy (TEM) and high resolution transmission electron microscopy (HR-TEM) analysis was done with a Tecnai model TEM instrument (TecnaiTM G2 F20, FEI) with an accelerating voltage of 200 KV. The UV-Visible (UV-Vis) absorption spectra were done in a Unico (model 4802) UV-Vis-NIR spectrophotometer equipped with a 1 cm quartz cuvette holder for liquid samples. The Energy Dispersive X-ray Spectroscopy (EDS) analysis was done with the Field Emission Scanning Electron Microscopy (FE-SEM) instrument (Zeiss ultra FE-SEM instruments) with a separate EDS detector (INCA) connected to that instrument. The X-ray diffraction (XRD) analysis was done using a PAN analytical Advanced Bragg-Brentano X-ray powder diffractometer (XRD) with Cu K<sub>α</sub> radiation ( $\lambda = 0.154$  nm) with a scanning rate of 7 degree per minute in the  $2\theta$  range 10-90°. The photoluminescence (PL) study was done with Varian

(Cary Eclipse Winflr) fluorescence spectrophotometer (serial number el02045776) both in excitation and emission mode using a xenon pump lamps. The Fourier Transform Infrared (FT-IR) spectroscopy analysis was done with the model Nexus 670 (FTIR), Centaurms 10X (Microscope) having spectral Range 4,000 to 400  $\text{cm}^{-1}$  with a MCT-B detector. The thermal analysis study was recorded with a thermal analyser-simultaneous TGA/DTA instrument with model name SDT Q600 and the analysis was performed in air. A hot air oven (temperature up to 1000  $^{\circ}\text{C}$ ) was used to anneal the samples at specific temperature. All the electrochemical experiments were examined using an AUTOLAB PGSTAT302N electrochemical work station in 2 M KOH aqueous solution. For DSSC sample preparation, the thickness of working electrode was measured by SJ-301 surface roughness tester. The conductivity (current-voltage, I-V) measurement was performed by using a solar simulator having model number SS80AAA under the light illumination of 1000  $\text{W}/\text{m}^2$ . A spin coater is used to prepare the counter electrode by using Hexachloroplatinic acid solution over glass substrate. The spin coater was purchased from Spektron Company, Chennai. The rotating speed was 1000 rpm and the samples were coated for 100 second over FTO plate for DSSC study.

#### **Preparation of sample for different other characterizations.**

The aggregated,  $\text{SrTiO}_3$  nano-assemblies on DNA scaffold were characterized using UV-Vis, TEM, EDS, XRD, XPS, photoluminescence (PL), FT-IR, and thermal analyses. The  $\text{SrTiO}_3$  nano-assemblies solution after successive centrifugation and annealing was used for the measurement in UV-Vis spectrophotometer after dispersing in aqueous solution. The solid  $\text{SrTiO}_3$  powder was mixed with DI water, sonicated for 20 min, and used for TEM sample preparation and other thin films preparation. The dispersed  $\text{SrTiO}_3$  nano-assemblies in aqueous solution were used for the PL measurement. The samples for TEM were prepared by placing a drop of the corresponding  $\text{SrTiO}_3$  NPs solution onto a carbon coated Cu grid followed by slow evaporation of solvent at ambient conditions. The solid  $\text{SrTiO}_3$  powder was directly used for XPS analysis. For EDS, XRD and FT-IR analysis, glass slides were used as substrates for thin film preparation. The slides were cleaned thoroughly in acetone and sonicated for about 20 min. The cleaned substrates were covered with the  $\text{SrTiO}_3$  nano-assemblies solution and then dried in air. After the first layer was deposited, subsequent layers were deposited by repeatedly adding more  $\text{SrTiO}_3$  nano-assemblies solution and drying.

Final samples were obtained after 5-6 times depositions and then analyzed using the above techniques. For TGA/DTA analysis, the as-prepared DNA-SrTiO<sub>3</sub> nanopowders are directly used for the measurement. The sample fabrication for supercapacitor and DSSC studies are given in main MS under experimental section.

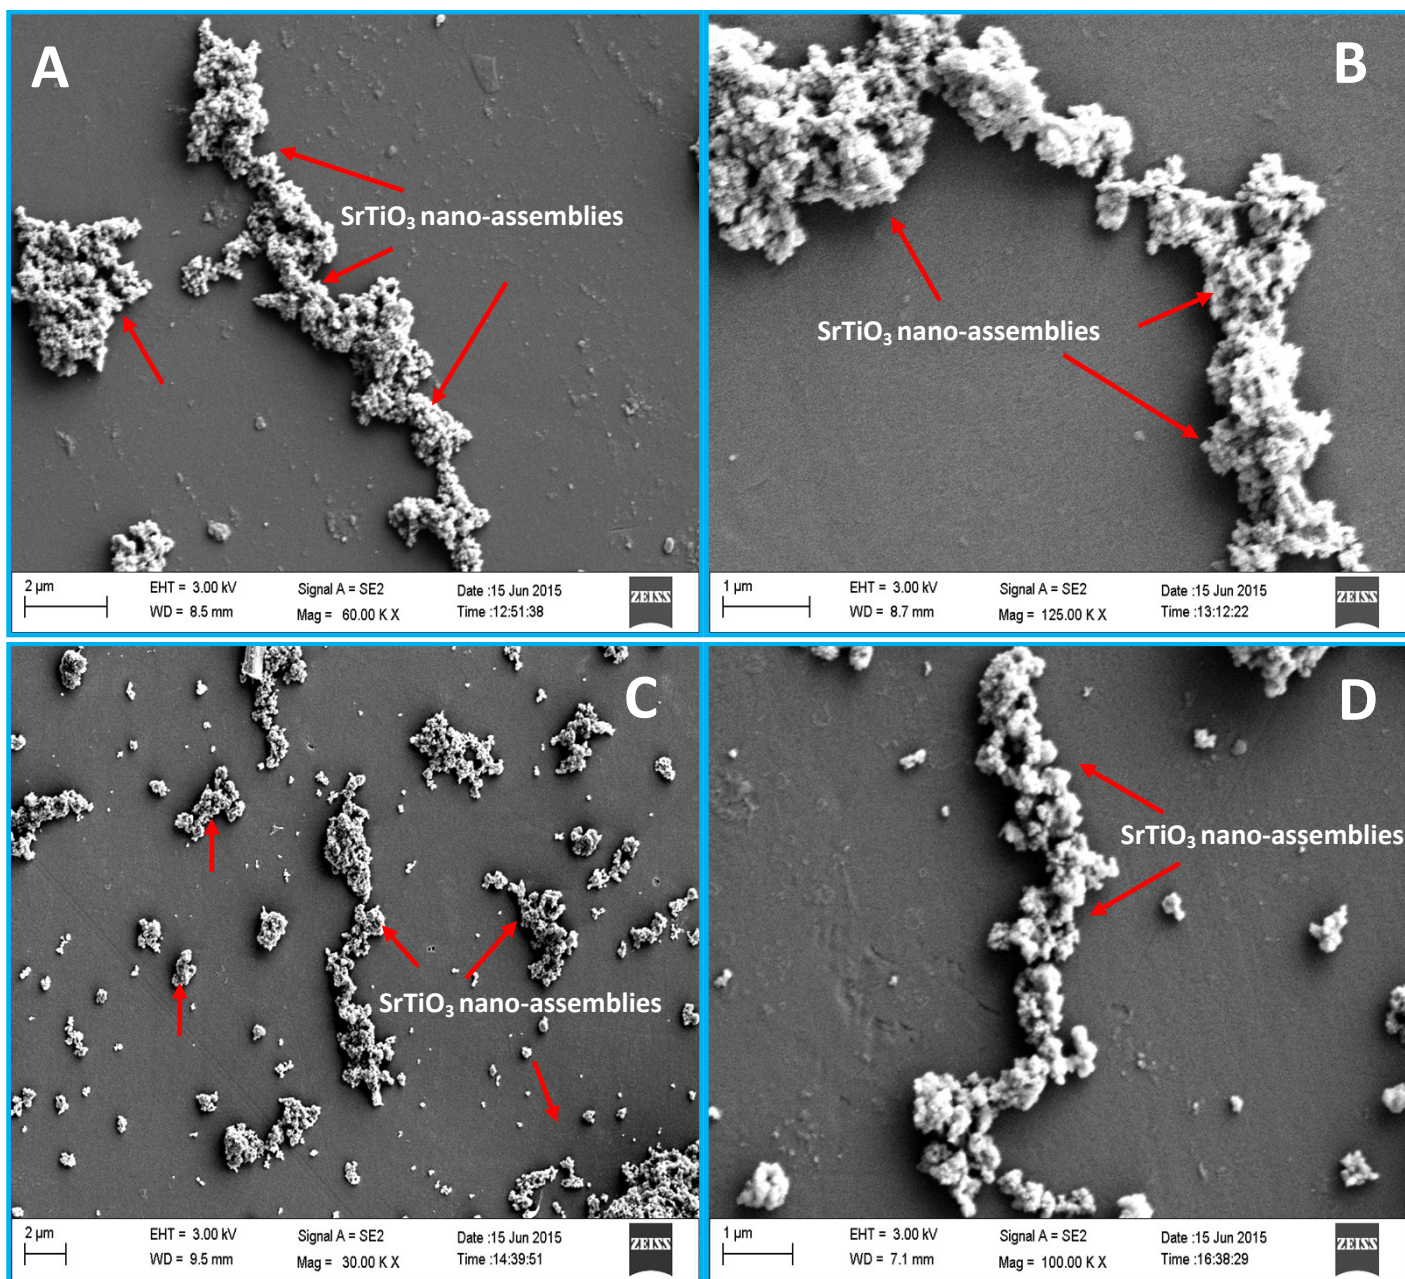

**Figure S-1:** Low and high magnified FE-SEM image of the smaller size SrTiO<sub>3</sub> nano-assemblies (A-B) and larger size SrTiO<sub>3</sub> nano-assemblies (C-D) on DNA scaffold.

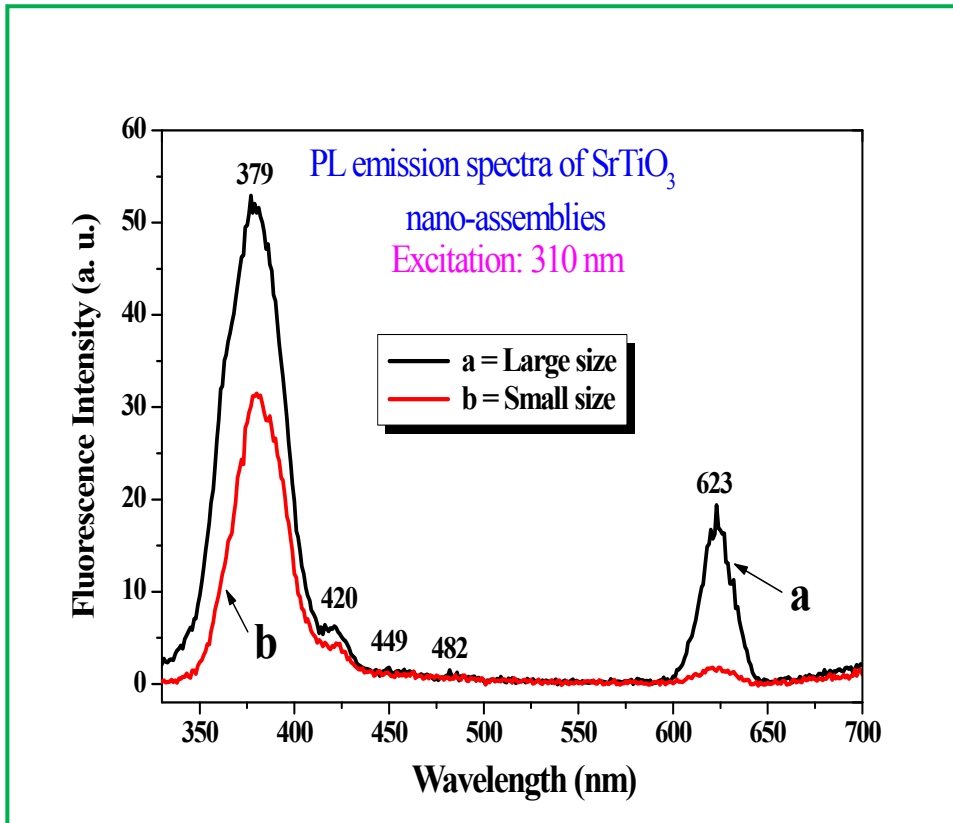

**Figure S-2:** The photoluminescence (PL) emission spectra of SrTiO<sub>3</sub> nano-assemblies on DNA with an excitation wavelength at 310 nm. Curve a and curve b indicate the SrTiO<sub>3</sub> nano-assemblies having large and small size respectively.

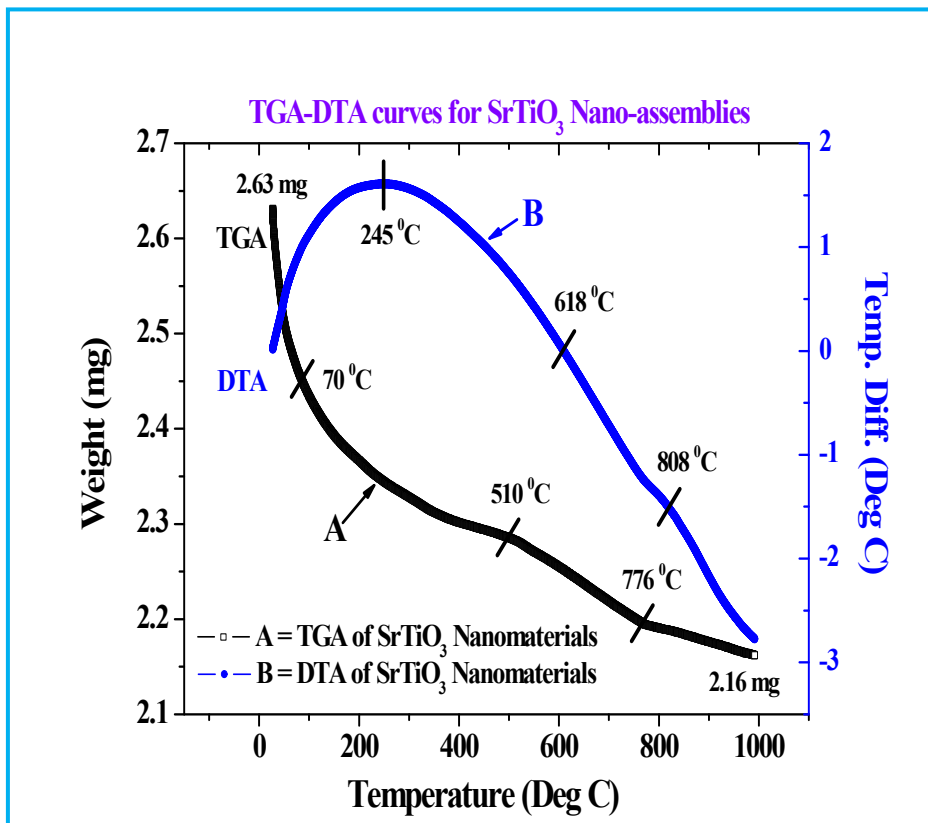

**Figure S-3:** The thermo gravimetric analysis (TGA) and differential thermal analysis (DTA) of the DNA- SrTiO<sub>3</sub> nano-assemblies where curve A indicates the TGA curve and curve B is the DTA curve respectively.

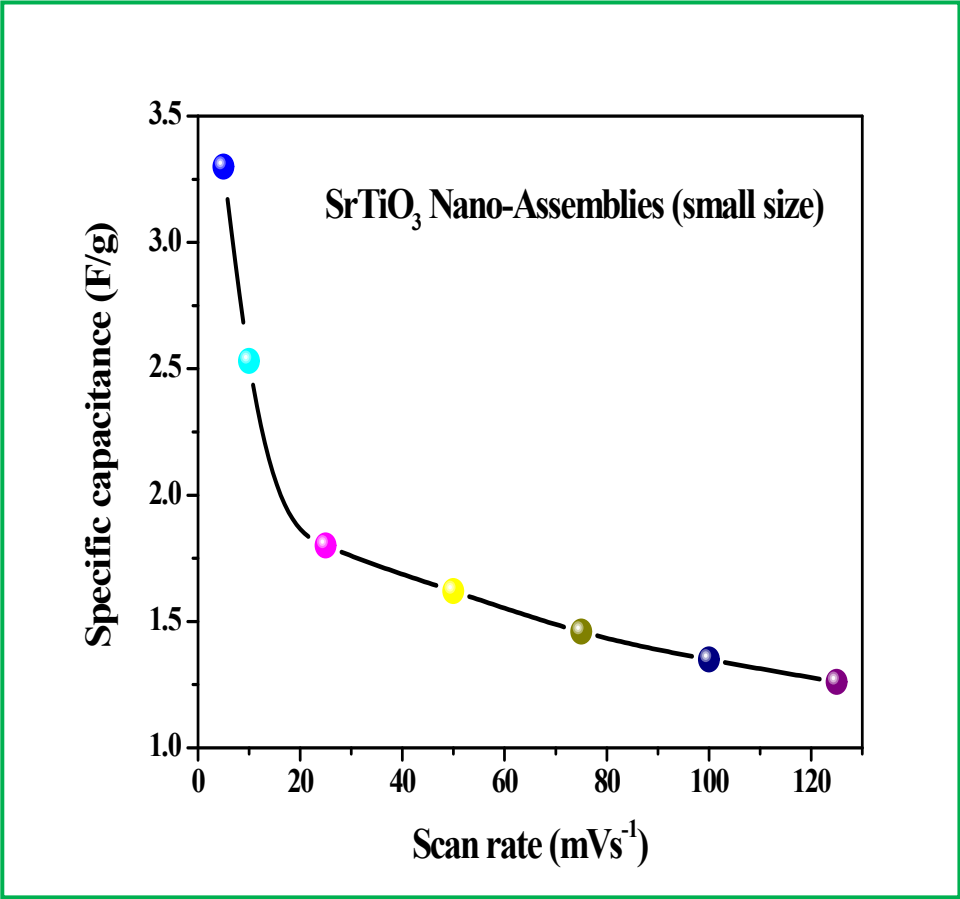

**Figure S-4:** Specific capacitance as function of scan rate for small size SrTiO<sub>3</sub> nano-assemblies

**Table S-1**

Table S-2

| Experimental and Reported FT-IR bands for DNA                |                                                                                |                                                                         |
|--------------------------------------------------------------|--------------------------------------------------------------------------------|-------------------------------------------------------------------------|
| FT-IR bands (cm <sup>-1</sup> )<br>(experimentally observed) | FT-IR frequency<br>range (cm <sup>-1</sup> )<br>(reported value) <sup>70</sup> | Absorbing bonds/vibration<br>types                                      |
| 3438                                                         | 3100-3750                                                                      | v (OH group in DNA/water)                                               |
| 2884                                                         | 2800-2950                                                                      | Symmetric stretching vibration<br>(C-H bonds in -CH <sub>2</sub> group) |
| 1734                                                         | 1750-1595                                                                      | C=O, C-N, N-H <sup>70</sup>                                             |
| 1481                                                         | 1496-1480                                                                      | Bending ( $\delta$ ) of C-H bond in CH <sub>2</sub>                     |
| 1219                                                         | 1170-1300                                                                      | Asymmetric stretching of PO <sub>2</sub> -<br>group                     |
| 1052                                                         | 1150-990                                                                       | v (C-O-C, C-C) <sup>70</sup>                                            |

Table S-3

| S.No | Name of the<br>material                                | Synthesis<br>methodology                              | Jsc (mA/cm <sup>2</sup> ) | V <sub>oc</sub> (V) | FF (%) | $\eta$ (%)   | ref no.      |
|------|--------------------------------------------------------|-------------------------------------------------------|---------------------------|---------------------|--------|--------------|--------------|
| 1    | SrTiO <sub>3</sub><br>graphene<br>composite            | Hydrothermal<br>method @200<br>°C for 50 h            | 17.09                     | 0.95                | 0.58   | 8.79         | 49           |
| 2    | SrTiO <sub>3</sub> NPs                                 | Hydrothermal<br>method@ 120<br>or 200 °C for 24<br>h. | 0.76                      | 1.53                | 0.67   | 0.78         | 50           |
| 3    | SrTiO <sub>3</sub> /TiO <sub>2</sub> -<br>P25          | Ball milling @<br>1200 °C for 2 h                     | 12.8                      | 0.73                | 0.56   | 5.32         | 78           |
| 4    | SrTiO <sub>3</sub> nano-<br>assemblies<br>(small size) | Solvo thermal<br>@ 80 °C for 2 h                      | 2.25                      | 0.44                | 46     | 0.0046       | This work    |
| Set  | Final Conc.                                            | Final conc.                                           | Amount                    | Volume of           | Total  | Shape of the | Approx. size |

Reference 49,50,78 as shown here are given under main text.
